# Supplementary material for: The N-terminus of the human RecQL4 helicase is a homeodomain-like DNA interaction motif
Source: PubMed Central journal article supplement — Nucleic Acids Res. 2012 Jun 22;40(17):8309–24. doi: 10.1093/nar/gks591 (PMC3458545; doi:10.1093/nar/gks591), 2012-06-22
Supplement: supp_gks591_nar-00404-r-2012-File009.pdf [file supp_gks591_nar-00404-r-2012-File009.pdf]

# Supplemental Information

## The N-terminus of the human RecQL4 helicase is a homeodomain-like DNA interaction motif

Oliver Ohlenschläger<sup>1+</sup>, Anja Kuhnert<sup>3+</sup>, Annerose Schneider<sup>2</sup>, Sebastian Haumann<sup>1</sup>, Peter Bellstedt<sup>1</sup>, Heidi Keller<sup>2</sup>, Hans-Peter Saluz<sup>3</sup>, Peter Hortschansky<sup>4</sup>, Frank Hänel<sup>3</sup>, Frank Grosse<sup>2</sup>, Matthias Görlach<sup>1</sup> and Helmut Pospiech<sup>2,\*</sup>

Research groups <sup>1</sup>Biomolecular NMR Spectroscopy and <sup>2</sup>Biochemistry, Leibniz Institute for Age Research – Fritz Lipmann Institute, Beutenbergstr. 11, D-07745 Jena, Germany, <sup>3</sup>Dept. of Cell and Molecular Biology, and <sup>4</sup>Dept. Molecular and Applied Microbiology, Leibniz Institute for Natural Product Research and Infection Biology – Hans Knöll Institute, Beutenbergstr. 11a, D-07745 Jena, Germany

## Supplemental Figures

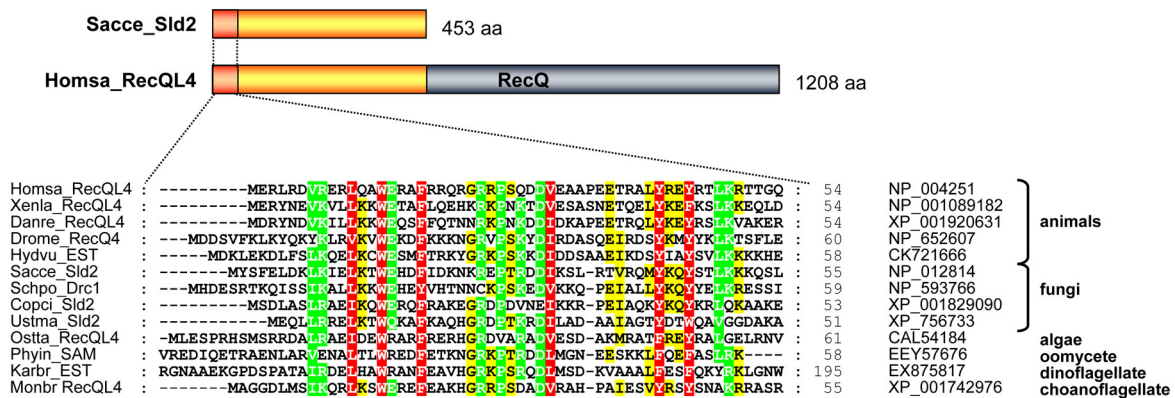

**Supplemental Figure S1: Domain organisation of yeast Sld2 and human RecQL4, and conservation of the amino acid sequence in the N-terminal domain of the RecQL4/Sld2 protein family.** Genebank accession numbers are given on the right. Abbreviations are as follows: Homsa, *Homo sapiens*; Xenla, *Xenopus laevis*; Danre, *Danio rerio*; Drome, *Drosophila melanogaster*; Hydву, *Hydra vulgaris*; Sacce, *Saccharomyces cerevisiae*; Copci, *Coprinopsis cinerea*; Ustma, *Ustilago maydis*; Ostta, *Ostreococcus tauri*; Phyin, *Phytophthora infestans*; Karbr, *Karenia brevis*; Monbr, *Monosiga brevicollis*.

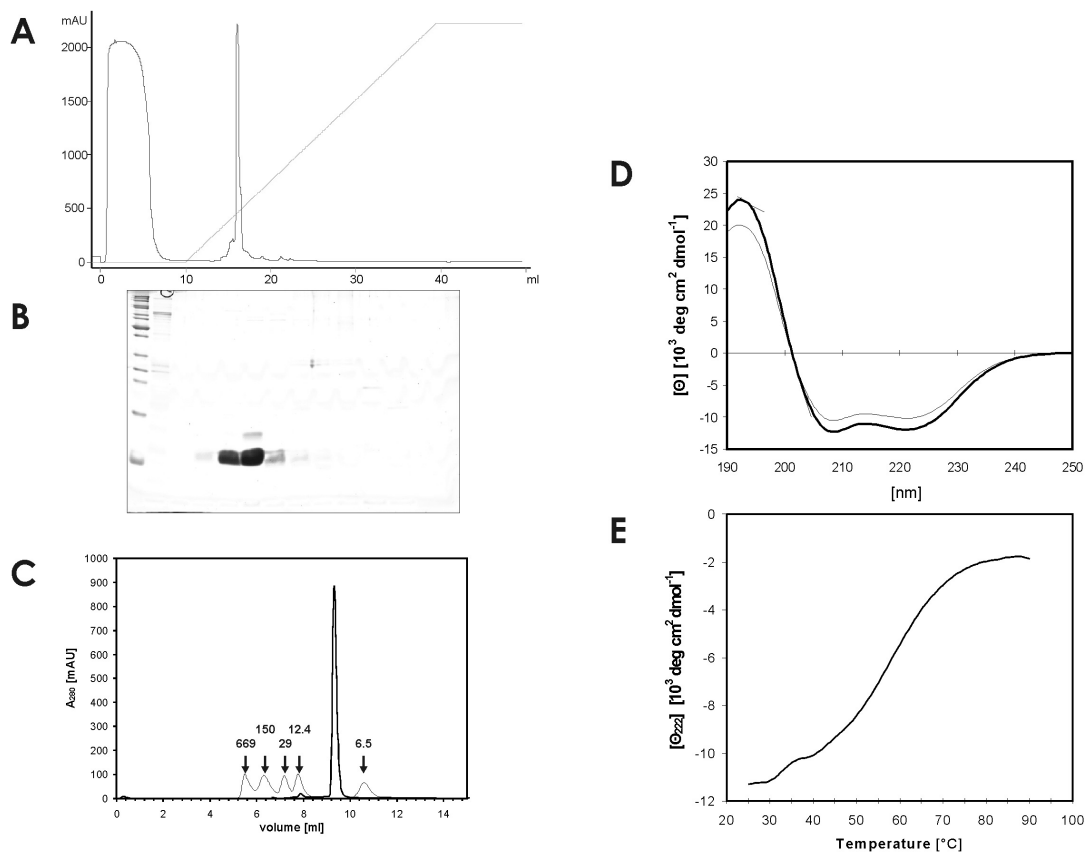

**Supplemental Figure S2:** Purification and biophysical analysis of RecQL4\_N54. **A**, Elution profile of RecQL4\_N54 from a MonoS column (top). RecQL4\_N54 was purified as described in Materials and Methods. Elution was performed by a linear gradient of 0 – 2 M NaCl in 20 mM potassium phosphate, pH 7.4, 1 mM EDTA, 1 mM DTT with an ÄKTA system. **B**, Equal volumes of the MonoS peak fractions were analysed by SDS-PAGE following Coomassie brilliant blue staining; **C**, Analytical gel filtration. A sample of the pooled RecQL4\_N54 MonoS peak was applied to an analytical G3000PWXL gel filtration column developed with 10 mM potassium phosphate, pH 7.4. The position of the molecular weight markers (thyroglobulin, 669 kDa; alcohol dehydrogenase, 150 kDa; carbonic anhydrase, 29 kDa; cytochrom c, 12.4 kDa; aprotinin, 6.5 kDa) analysed in a separate experiment are indicated (grey line); **D**, Far-UV CD spectrum of RecQL4\_N54 in 10 mM potassium phosphate, pH 7.4. The grey line represents the corresponding CD spectrum after the temperature scan, indicating the thermal denaturation is largely reversible. **E**, CD spectroscopic melting profile of RecQL4\_N54 in 10 mM potassium phosphate. The protein was subjected to increasing temperature in order to evaluate its thermal stability. Amount of secondary structure was monitored as a function of the reduction in ellipticity. The molar ellipticity at 222 nm as function of temperature is shown.

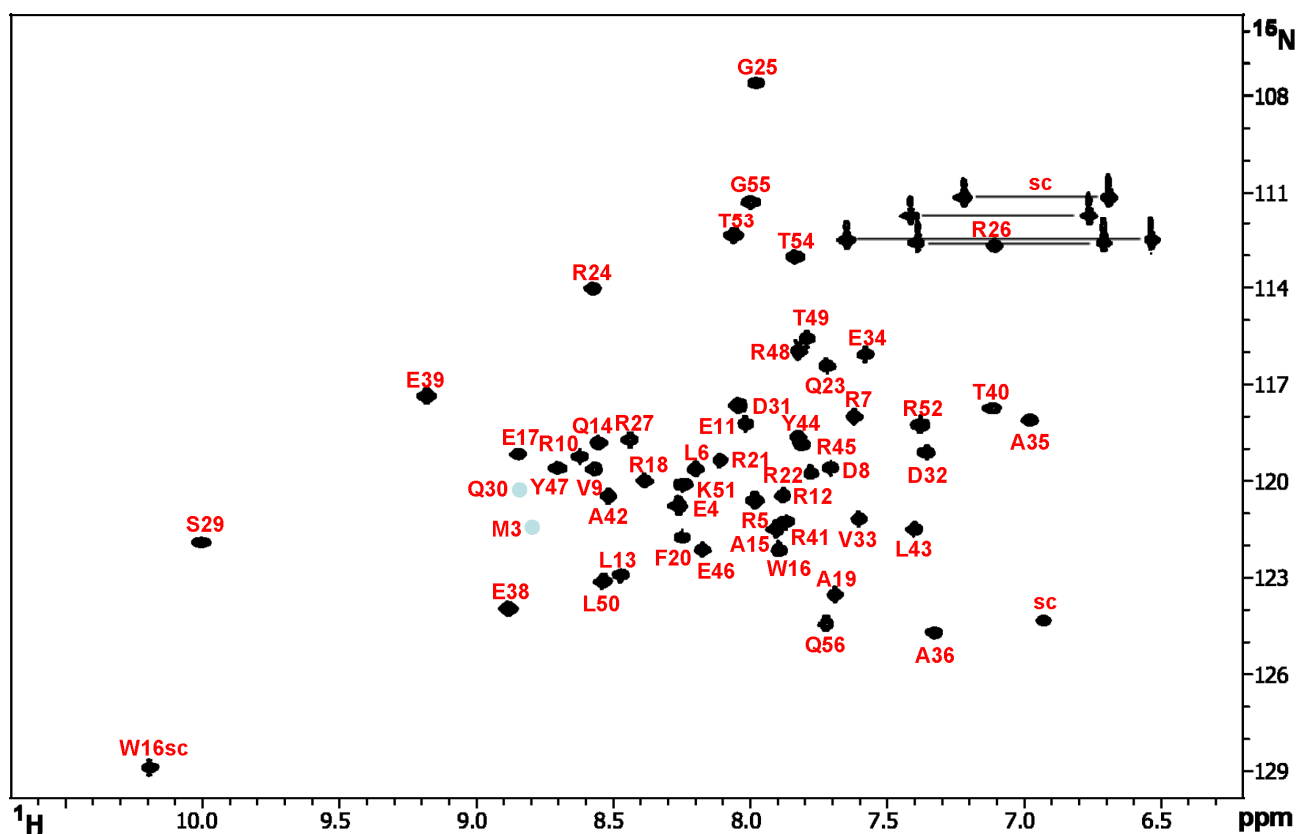

**Supplemental Figure S3:** [ $^1\text{H}$ ,  $^{15}\text{N}$ ]-HSQC spectrum of RecQL4\_N54. Backbone amide resonance assignments are indicated as one-letter code. Shaded circles indicate cross peaks observable only at lower thresholds. *Of note:* the first native RecQL4 residue is M3. The numbering of the a.a. positions in RecQL4\_N54 starts with two non-native residues derived from the expression construct to maintain consistency with the related PDB (2KMU) and BMRB (16544) data base entries.

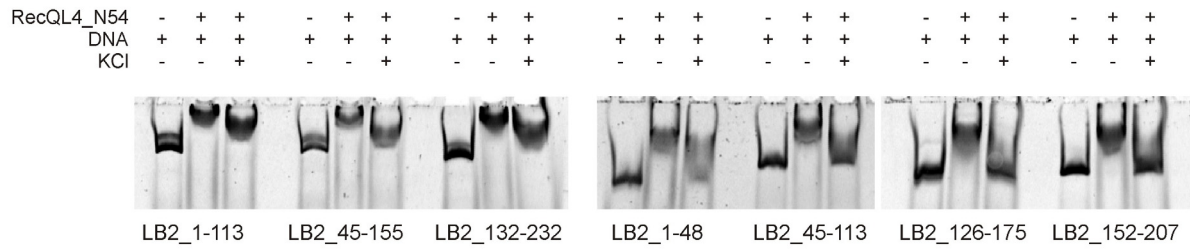

**Supplemental Figure S4.** RecQL4\_N54 binds DNA without sequence specificity. dsDNA fragments covering different parts of 232 bp genomic DNA derived from the human replication origin at the LB2 locus were analysed by EMSA. All fragments assessed were shifted with similar efficiency by RecQL4\_N54. Binding reactions were performed with RecQL4\_N54 (2  $\mu$ g / ~300 nmol) and 200 ng of each DNA fragment. Details for the DNA fragments are provided in Supplemental Table S1. The DNA binding buffer was supplemented with 100 mM KCl where indicated.

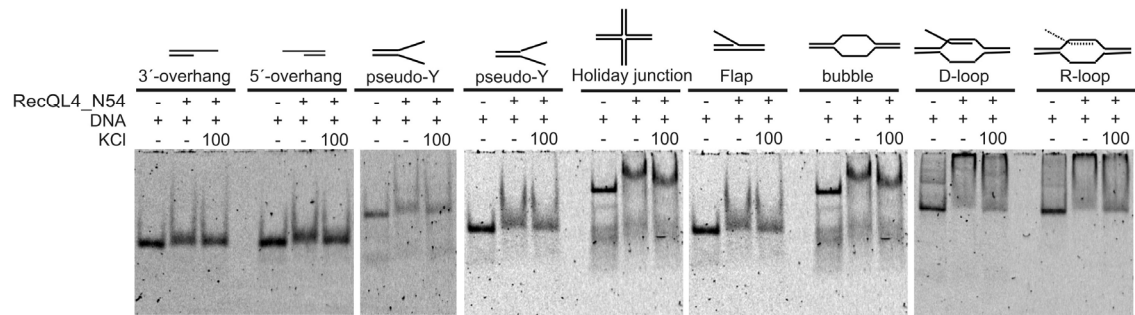

**Supplemental Figure S5.** RecQL4\_N54 binds branched DNA substrates. Binding of RecQL4\_N54 to various DNA substrates as schematically depicted on top was assessed by EMSA. Binding reactions were performed with RecQL4\_N54 (2  $\mu$ g /  $\sim$ 300 nmol) and 30 nmol of each DNA fragment. Details for the DNA fragments are provided in Supplemental Table S3. The DNA binding buffer was supplemented with 100 mM KCl where indicated.

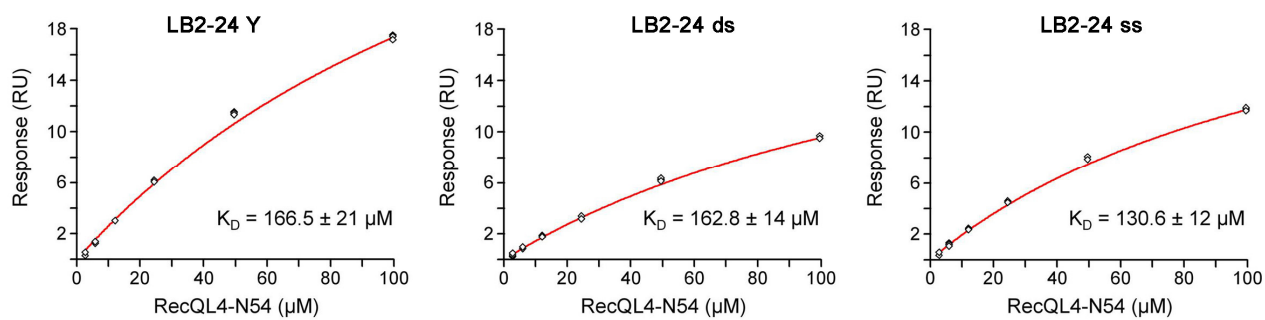

**Supplemental Figure S6.** Real-time binding analysis of RecQL4-N54 to Y-shaped (Y), double stranded (ds) and single stranded (ss) DNA, respectively. Fits of the surface plasmon resonance equilibrium responses for DNA binding of RecQL4\_N54 using HEPES buffer containing 150 mM NaCl.

## Supplemental Tables

**Supplemental Table S1.** Primers used to amplify defined human origins of DNA replication.

| GenBank accession no. / primer | Sequence (5' to 3')                                                                                                                                                                                                                                                                                                                             | Primer length (bp) | T <sub>m</sub> (°C) | Map position (bp) | Product length (bp) |
|--------------------------------|-------------------------------------------------------------------------------------------------------------------------------------------------------------------------------------------------------------------------------------------------------------------------------------------------------------------------------------------------|--------------------|---------------------|-------------------|---------------------|
| U63630a                        | <b>Connelly, M. A., H. Zhang, J. Kieleczawa, and C. W. Anderson.</b> 1998. The promoters for human DNA-PKcs (PRKDC) and MCM4: divergently transcribed genes located at chromosome 8 band q11. <i>Genomics</i> <b>47</b> :71–83.                                                                                                                 |                    |                     |                   |                     |
| MCM4upr-F                      | AATTAAGGACGGGAGGTGGT                                                                                                                                                                                                                                                                                                                            | 20                 | 59.69               | 13167 - 13408     | 242                 |
| MCM4upr-R                      | TTGGGTGGCTACTTGGTGGT                                                                                                                                                                                                                                                                                                                            | 20                 | 60.41               |                   |                     |
|                                | AATTAAGGAC GGGAGGTGGT GGGGATGGTC TCATTATGTT GCCCAGACTG GTCTCGAACT<br>CCTGCGATCC CCCC GCCTCA GCTTCCTAAA GTGTTGGGAC TGCAGGCGGG CATCACCGCC<br>CCC GACCGCG TTTGTCGTTT TTTATCGAGG AACAACTTG GAACTCTTGA CCTAGGCCCC<br>TCGCTTGTTT TATCTGCCTC TGGTATTTAT TTAGCCAAGT CCAACACCAA GTAGCCACCC<br>AA                                                         |                    |                     |                   |                     |
| MCM4in1-F                      | ATCTCGCCTAATCCCACCAGTACC                                                                                                                                                                                                                                                                                                                        | 24                 | 65.57               | 14364 – 14656     | 293                 |
| MCM4in2-R                      | CATATTCACTACTAGACCCTCCGG                                                                                                                                                                                                                                                                                                                        | 24                 | 60.26               |                   |                     |
|                                | ATCTCGCCTA ATCCCACCAG TACCTTTTCC AAACCCCTCT ATTTGCCGTT CCTACTTTGA<br>GAAAAATTGA AGAAATGTAA TTGAAGTCAT GTTCTTTTAA CTCTTTAGCA ATGCCTGGGT<br>GGGAAC TTTT TCCCCTTTGT AGTAAAAGTG CCTCTTTTAA GCATTTTAAA TATTCAAATA<br>CTTAATTATG TGGATCTCCT GTATTCCTTC TTTAAAACAC GAGTATGCAG ACCTTGATGT<br>TGTGCCCTAT TAAAAGGTGA GATTTTCTTC CGGAGGGTCT AGTAGTGAAT ATG |                    |                     |                   |                     |
| M94363b                        | <b>Biamonti, G., M. Giacca, G. Perini, G. Contreas, L. Zentilin, F. Weighardt, M. Guerra, G. Della Valle, S. Saccone, S. Riva, et al.</b> 1992. The gene for a novel human lamin maps at a highly transcribed locus of chromosome 19 which replicates at the onset of S phase. <i>Mol. Cell. Biol.</i> <b>12</b> :3499–3506.                    |                    |                     |                   |                     |
| LB2-F                          | GGCTGGCATGGACTTTCATTTTCAG                                                                                                                                                                                                                                                                                                                       | 24                 | 67.97               | 3839 – 4070       | 232                 |
| LB2-R                          | GTGGAGGGATCTTTCTTAGACATC                                                                                                                                                                                                                                                                                                                        | 24                 | 59.51               |                   |                     |
|                                | GGCTGGCATG GACTTTCATT TCAGAGATTC GGTTTTTAAG AAGATGCATG CCTAGCGTGT<br>TCTTTTTTTTT TTCCAATGAT TTGTAATATA CATTTTATGA CTGGAAACTT TTTTGTACAA<br>CACTCCAATA AACATTTTGA TTTTAGGTTT TGCCTCTGAG TTTATTCCTG AGGGGAAGCT<br>CGAGCCGGGC CTCTGCCCTA ATGAAGCGGA TGTCTAAGAA AGATCCCTCC AC                                                                       |                    |                     |                   |                     |
| LB2C1-F                        | GTTAACAGTCCAGGCGCATGGGCC                                                                                                                                                                                                                                                                                                                        | 23                 | 70.72               | 1 – 240           | 240                 |
| LB2C1-R                        | CCATCAGGGTCCACTCTGGTTCC                                                                                                                                                                                                                                                                                                                         | 23                 | 68.27               |                   |                     |
|                                | GTTAACAGTC AGGCGCATGG GCCATGGAGC CTCCTGGGTG TCAGATCCCA GTTCAGCCCC<br>TGCTTGCCAA GAGCCCTTGG CCTCTGTGAA CCCTGGTCTC TTCTTGTGTA TCCTGGGGAC<br>CATCACCTG GATAAGCCTG CGTCGGGCTG GAAGGACTGA ACGCCAGGG CATTGAAGGG<br>GCTTTGTGGT AGGGGCCACT GGCTGGCCCA CGTCCCTGGA ACCAGAGGTG ACCCTGATGG                                                                  |                    |                     |                   |                     |
| AL035652                       | <b>Keller C, Ladenburger EM, Kremer M, Knippers R</b> (2002). The origin recognition complex marks a replication origin in the human TOP1 gene promoter. <i>J. Biol. Chem.</i> <b>277</b> :31430-40.                                                                                                                                            |                    |                     |                   |                     |
| TopProm-F                      | CACTGCCTAGCAGAGGGGCTG                                                                                                                                                                                                                                                                                                                           | 21                 | 66.74               | 12461 - 12749     | 295                 |
| TopProm-R                      | GCAGTTGTGTAACAGCCTAAGTTTCG                                                                                                                                                                                                                                                                                                                      | 25                 | 63.39               |                   |                     |
|                                | CACTGCCTAG CAGAGGGGCT GGGGTTCCGA GAAAAAGCGT CTGGAGAGGA AGGGGAGGCT<br>GCTTGGGGTG GGACGCCGTG GGAGGAGTCG GCTCCTTATG CAAATCACAG CGGAGCGCGC<br>ACGGTCCGGA GCGGGGCTT GCGATGCAAA GACAGGTCCG TCTGGCGAAC AGCGAGGGGG<br>CGGGCCGCAA CCCTCTGCCT CTTTCCGCGA GCGCTGACGT CGCCGACGTG TTGTTTAAAA<br>GCGGCCGCGC AGGCGCAGTG AGCCCAAATG CGAACTTAGG CTGTTACACA ACTGC |                    |                     |                   |                     |
| TopM1-F                        | CATGTCTTAAAGTTTATATTCCAAA                                                                                                                                                                                                                                                                                                                       | 25                 | 54.03               | 17370 - 17550     | 181                 |
| TopM1-R                        | CAGAATCATTTTCCATACCATTAG                                                                                                                                                                                                                                                                                                                        | 24                 | 56.86               |                   |                     |
|                                | CATGTCTTAA AGTTTATATT CAAAATTGG GCTGTGAGGT TTTTTTGTTT TGCTTGT TTT<br>CAGTGCATGT GTGGGTGGG GAGGTGCAAA AAAATGTTTG CTTTCTAATA TACAGCTTTG<br>TTGTATATTA ATTATATAGT AACAGTTGTC CCTGCTGCTA ATGGTATGGA AAATGATTCT<br>G                                                                                                                                 |                    |                     |                   |                     |



**Supplemental Table S2.** Primers/oligonucleotides used to produce fragments covering portions of the *LB2* origin of DNA replication region.

| Fragment    | Primer   | Sequence (5' to 3')               | Primer length (bp) | T <sub>m</sub> (°C) | Map position (bp) <sup>a</sup> | Product length (bp) |
|-------------|----------|-----------------------------------|--------------------|---------------------|--------------------------------|---------------------|
| LB2         | LB2-F    | GGCTGGCATGGACTTTCATTTTCAG         | 24                 | 68                  | 3839 – 4070                    | 232                 |
|             | LB2-R    | GTGGAGGGATCTTTCTTAGACATC          | 24                 | 60                  |                                |                     |
| LB2_1-113   | LB2-F    | GGCTGGCATGGACTTTCATTTTCAG         | 24                 | 68                  | 3839 – 3951                    | 113                 |
|             | LB2-R113 | AAAAAGTTTCCAGTCATAAAATGTATATTACAA | 33                 | 59                  |                                |                     |
| LB2_45-155  | LB2-F45  | TGCATGCCTAGCGTGTTCCT              | 20                 | 58                  | 3884 – 3995                    | 111                 |
|             | LB2-R155 | AGGCAGAACCTAAAAATCAAAATGTTTA      | 27                 | 59                  |                                |                     |
| LB2_132-232 | LB2-F132 | ACATTTTGATTTTAGGTTCTGCCTCT        | 25                 | 59                  | 3970 – 4070                    | 101                 |
|             | LB2-R    | GTGGAGGGATCTTTCTTAGACATC          | 24                 | 60                  |                                |                     |
| LB2_1-48    | LB2-F    | GGCTGGCATGGACTTTCATTTTCAG         | 24                 | 68                  | 3839 – 3886                    | 48                  |
|             | LB2-R48  | TGCATCTTCTTAAAAACCGAATCTCT        | 26                 | 60                  |                                |                     |
| LB2_45-113  | LB2-F45  | TGCATGCCTAGCGTGTTCCT              | 20                 | 58                  | 3884 – 3951                    | 69                  |
|             | LB2-R113 | AAAAAGTTTCCAGTCATAAAATGTATATTACAA | 33                 | 59                  |                                |                     |
| LB2_126-175 | LB2-F126 | CAATAAACATTTTGATTTTAGGTTCTGC      | 28                 | 59                  | 3965 - 4053                    | 50                  |
|             | LB2-R175 | CCCCTCAGGAATAAACTCAGAGG           | 23                 | 59                  |                                |                     |
| LB2_152-207 | LB2-F152 | GCCTCTGAGTTTATTCCTGAGGG           | 23                 | 59                  | 3991-4045                      | 56                  |
|             | LB2-R207 | GCTTCATTAGGGCAGAGGCC              | 20                 | 60                  |                                |                     |
| LB2_1-24    | LB2-F    | GGCTGGCATGGACTTTCATTTTCAG         | 24                 | 68                  | 3839 – 3862                    | 24                  |
|             | LB2-R24  | CTGAAATGAAAGTCCATGCCAGCC          | 24                 | 63                  |                                |                     |
| LB2_1-24Y   | LB2-F    | GGCTGGCATGGACTTTCATTTTCAG         | 24                 | 68                  | n.a.                           | n.a.                |
|             | LB2-R24Y | GACTTTACAAAGTCCATGCCAGCC          | 24                 | 63                  |                                |                     |
| LB2_13-36   | LB2-F13  | CTTTCATTTTCAGAGATTCGGTTTT         | 24                 | 56                  | 3851 – 3874                    | 24                  |
|             | LB2-R36  | AAAAACCGAATCTCTGAAATGAAAG         | 24                 | 56                  |                                |                     |
| LB2_23-48   | LB2-F23  | AGAGATTCGGTTTTTAAGAAGATGCA        | 26                 | 68                  | 3861 – 3886                    | 26                  |
|             | LB2-R48  | TGCATCTTCTTAAAAACCGAATCTCT        | 26                 | 59                  |                                |                     |

<sup>a</sup>Map positions are indicated according to: **Biamonti, G., M. Giacca, G. Perini, G. Contreas, L. Zentilin, F. Weighardt, M. Guerra, G. Della Valle, S. Saccone, S. Riva, et al.** 1992. The gene for a novel human lamin maps at a highly transcribed locus of chromosome 19 which replicates at the onset of S phase. *Mol. Cell. Biol.* **12**:3499–3506.

**Supplemental Table S3.** Oligonucleotides used to assemble the DNA substrates utilized in Supplemental Fig. S5.

| Construct | Sequence                                                                                                                                                                                                                          | Structure                                                                                            |
|-----------|-----------------------------------------------------------------------------------------------------------------------------------------------------------------------------------------------------------------------------------|------------------------------------------------------------------------------------------------------|
| M2-M1     | 5' -GCTTGCATGCCTGCAGGCCAGCCTCAATCTCATC<br>     <br>3' -CGAACGTACGGACGTCC                                                                                                                                                          | 3'-overhang<br>   |
| M3-M1     | 5' -CTACTCTAACTCCGACCGCTTGCATGCCTGCAGG<br>     <br>3' - CGAACGTACGGACGTCC                                                                                                                                                         | 5'-overhang<br>   |
| M3-S3     | 5' -CTACTCTAACTCCGACCGCTTGCATGCCTGCAGG<br>     <br>3' -GATGAGATTGAGGCTGGCGAACGTACGGACGTCC                                                                                                                                         | dsDNA<br>         |
| M2-M4     | 5' -GCTTGCATGCCTGCAGG<br>     <br>3' -CGAACGTACGGACGTCC<br>CCAGCCTCAATCTCATC<br>AGCTGAGATCTCTCCTA                                                                                                                                 | Y-shaped DNA<br>  |
| S4-M3     | 5' -ATCCTCTCTAGAGTCAA<br>GGTCGGAGTTAGAGTAG<br>     <br>CCAGCCTCAATCTCATC<br>3' -GGACGTCCGTACGTTTCG                                                                                                                                | Y--shaped DNA<br> |
| M1-S4-M3  | 5' -ATCCTCTCTAGAGTCAA<br>5' -CCTGCAGGCATGCAAGC GGTCGGAGTTAGAGTAG<br>     <br>3' -GGACGTCCGTACGTTTCG-CCAGCCTCAATCTCATC                                                                                                             | FLAP<br>          |
| M5-M6     | 5' -GTACCCGGGGATCCTCTAGAGT<br>     <br>3' -CATGGGCCCTAGGAGATCTCA<br>CGACCTGCAGGCATGCAAGCTT<br>GGCCTGGCCGTCGTTTTACAAC<br>     <br>CCGTGACCGGCAGCAAATGTTG                                                                           | bubble<br>      |
| M5-M6-M2  | 3' - CTACTCTAACTCCGACC<br>5' -GTACCCGGGGATCCTCTAGAGT<br>     <br>3' -CATGGGCCCTAGGAGATCTCA<br>CGACCTGCAGGCATGCAAGCTT<br>GGACGTCCGTACGTTTCG<br>GGCCTGGCCGTCGTTTTACAAC<br>     <br>CCGTGACCGGCAGCAAATGTTG<br>CTACTCTAACTCCGACCCTTTT | D-loop<br>      |



#### Supplemental Table S4. SPR equilibrium data for DNA binding of RecQL4\_N54 (HBS-EP150)

| DNA       | MW DNA (Da) | DNA bound (RU) | R <sub>max</sub> calc.* (RU) | R <sub>max</sub> (RU) | % of R <sub>max</sub> | K <sub>D</sub> (μM) |
|-----------|-------------|----------------|------------------------------|-----------------------|-----------------------|---------------------|
| LB2-24 Y  | 15061       | 45.0           | 20.4                         | 46.3                  | 227.0                 | 166.5 ± 21          |
| LB2-24 ds | 15110       | 43.7           | 19.8                         | 27.1                  | 136.9                 | 162.8 ± 14          |
| LB2-24 ss | 7780        | 23.4           | 20.6                         | 25.1                  | 121.8                 | 130.6 ± 12          |

\* R<sub>max</sub> calc. = 6836 Da (MW RecQL4-N54) / Mw DNA x DNA bound

#### Supplemental Methods

**CD spectroscopy.** CD spectroscopy was carried out at 20°C using a Jasco J-715 spectropolarimeter with a Jasco PFD-3505 temperature controller. Far-UV spectra of the protein (135 μg/ml – 20 μM) were recorded from 190 to 250 nm in 10 mM potassium phosphate, pH 7.5, with the following settings: response time 1 s; speed 50 nm/min; path length 1 mm; band width 1 nm; average of 5 scans. The mean molar ellipticity was calculated with the Jasco software. Protein melting was monitored simultaneously at 192, 208 and 222 nm in steps of 1°C from 20 to 98°C with the following instrument settings: temperature increase 30°C/h; response time 16 s; and path length 1 mm. Reversibility of the unfolding was assessed from a far-UV spectrum as described above recorded after the temperature scan.

**In silico analyses.** Homologues of RecQL4\_N54 were retrieved from the NCBI gene bank using PSI-BLAST (65) and the amino acid of the amino-terminal region of human RecQL4 as a bait. Additional sequences were retrieved from the Genebank EST collection using the TBLASTN program and human RecQL4\_N54 or its homologues as baits. Multiple sequence alignment was generated from the PSI-BLAST output and managed with the GENEDOC sequence editor (66). Secondary structure prediction data were generated at the PredictProtein server (67). Regions of disorder were predicted using the DISMETA server ([www-nmr.cabm.rutgers.edu/bioinformatics/disorder](http://www-nmr.cabm.rutgers.edu/bioinformatics/disorder)). Structural homologues of RecQL4\_N54 were identified with the DALI server ([www.ebi.ac.uk/dali](http://www.ebi.ac.uk/dali)) (32) using the structural model 1 as a bait.

#### Supplemental References

65. Altschul, S.F., Madden, T.L., Schaffer, A.A., Zhang, J., Zhang, Z., Miller, W. and Lipman, D.J. (1997) Gapped BLAST and PSI-BLAST: a new generation of protein database search programs. *Nucleic Acids Res*, **25**, 3389-3402.
66. Nicholas, K.B., Nicholas, H.B., Jr. and Deerfield, D.W., 2nd. (1997) GeneDoc: Analysis and visualization of genetic variation. *EMBNEW News*, **4**.
67. Rost, B., Yachdav, G. and Liu, J. (2004) The PredictProtein server. *Nucleic Acids Res*, **32**, W321-326.
